# Supplementary material
Source: PubMed Central journal article supplement (PMC7615897)
Supplement: EMS195591-supplement-Appendix.pdf [file EMS195591-supplement-Appendix.pdf]

**Current Status & Future of Dialysis, Vascular Access & Interventional**

**Nephrology in South & South East Asia**

**Country:** \_\_\_\_\_

**Representative:** \_\_\_\_\_

**Burden of ESRD**

|                                                                                                                              |                                                             |                                          |
|------------------------------------------------------------------------------------------------------------------------------|-------------------------------------------------------------|------------------------------------------|
| National population ( in millions)                                                                                           |                                                             |                                          |
| Incident & prevalent ESRD population<br>( Per Million )                                                                      | Incidence / million                                         | Prevalence/ million                      |
| %age of GDP as <b>Total national health expenditure</b>                                                                      |                                                             |                                          |
| Estimated Per Capita National Income<br>( in USD )                                                                           |                                                             |                                          |
| Top 3 Etiologies of CKD<br>(for e.g. DM,HT or Unknown)                                                                       | Number 1 Etiology<br>Number 2 Etiology<br>Number 3 Etiology |                                          |
| Average age of ESRD patient (in years)<br><b>(at start of dialysis)</b>                                                      | Male                                                        | female                                   |
| Dialysis Drop Out Rate & cause distribution<br>at 6 months<br><small>(Tick applicable reason from the right Column)</small>  | Rate in %                                                   | Death<br>Transplant<br>Financial Reasons |
| Dialysis Drop Out rate & cause distribution<br>at 12 months<br><small>(Tick applicable reason from the right Column)</small> | Rate in %                                                   | Death<br>Transplant<br>Financial Reasons |
| % distribution of Patients among<br>HD/PD/Transplant/ Conservative                                                           | HD<br><br>PD                                                | ( )<br><br>( )                           |

|                                                                              |                                                            |                          |
|------------------------------------------------------------------------------|------------------------------------------------------------|--------------------------|
|                                                                              | Transplant<br>conservative                                 | ( )<br>( )               |
| % distribution of HD frequency per week of Patients (total must be 100%)     | More than 2 per week<br>Less than 2 per week<br>2 per week | ( )<br>( )<br>( )        |
| Total no. of nephrologists in the country<br>( Number )                      |                                                            |                          |
| Number of dialysis centers in the country<br>( Number )                      |                                                            |                          |
| Average number of Dialysis machines per HD unit (the commonest one)          | Less than 10<br>10-20<br>20-40<br>More than 40             | ( )<br>( )<br>( )<br>( ) |
| % distribution of Funding for dialysis<br>(Govt,* insurance or * OPP)        | Govt<br>PPP<br>OPP                                         | ( )<br>( )<br>( )        |
| Are most of dialysis units supervised by Nephrologists directly? (Yes / No ) | Yes                                                        | No                       |
| Monthly cost of Hemodialysis & CAPD (in USD \$)                              |                                                            |                          |

- **PPP-PUBLIC PRIVATE PARTNERSHIP** (means Government pays to private party to deliver dialysis)
- **\* OPP-OUT OF POCKET PAYMENT** (means patient pays from his pocket)

**Status Of Vascular Access**

| % of Patients undergoing<br>“Planned initiation” of HD vs.<br>“Unplanned initiation “ | Planned initiation        | Unplanned initiation     |
|---------------------------------------------------------------------------------------|---------------------------|--------------------------|
| % of <b>Incident Hemodialysis</b><br>patients using AVF /AVG/ *<br>TCC/ * NON TCC     | AVF<br>AVG<br>TCC<br>nTCC | ( )<br>( )<br>( )<br>( ) |
| % of <b>Prevalent Hemodialysis</b><br>Patients using AVF /AVG/ *<br>TCC / * NON TCC   | AVF<br>AVG<br>TCC<br>nTCC | ( )<br>( )<br>( )<br>( ) |
| Average cost of AVF/AVG /*<br>TCC & * NTCC procedure<br>(in USD \$)                   | AVF<br>AVG<br>TCC<br>nTCC | ( )<br>( )<br>( )<br>( ) |
| AV Fistula Surgery done by:<br>Nephrologist / Surgeons (%)                            | Nephrologist              | Surgeons                 |
| AV Graft Surgery done by:<br>Nephrologist / Surgeons (%)                              | Nephrologist              | Surgeons                 |

***\*Tunneled Central Catheter (TCC) \* Non Tunneled Catheter (NTCC) or Acute Catheter***

**Interventional Nephrology (IN)**

**Who does the following Interventional Nephrology Procedures in your country.**

|                                                                         |                |          |        |
|-------------------------------------------------------------------------|----------------|----------|--------|
| <b>Non Tunneled Catheter</b>                                            | (Nephrologist) | (Others) | (both) |
| <b>Tunneled Central Catheter ( TCC )</b>                                | (Nephrologist) | (Others) | (both) |
| <b>Kidney Biopsy</b>                                                    | (Nephrologist) | (Others) | (both) |
| <b>AV Fistula</b>                                                       | (Nephrologist) | (Others) | (both) |
| <b>AV Graft</b>                                                         | (Nephrologist) | (Others) | (both) |
| <b>AVF Salvage Interventions (Peripheral &amp; Central Angioplasty)</b> | (Nephrologist) | (Others) | (both) |
| <b>PD Catheter Placement</b>                                            | (Nephrologist) | (Others) | (both) |

**What percent of nephrologists perform any IN procedure?**

|  |
|--|
|  |
|--|

**The common challenges to practice of Interventional Nephrology?** (Can check more than one box if appropriate)

|                                    |  |
|------------------------------------|--|
| <b>Time Constraint</b>             |  |
| <b>Lack of Backup Support</b>      |  |
| <b>No Formal Training</b>          |  |
| <b>Cost Issues</b>                 |  |
| <b>Fear of Medico Legal Issues</b> |  |

|                                                                 |  |
|-----------------------------------------------------------------|--|
| <b>Lack of Incentive</b>                                        |  |
| <b>Specialised for a Non Interventional Nephrology Practice</b> |  |
| <b>Not Applicable to our Institution / Practice</b>             |  |

**Do most of the Institutes run formal training programs for following procedures in your country?** (Check the box you feel appropriate)

|                                              |  |
|----------------------------------------------|--|
| <b>Kidney Biopsy</b>                         |  |
| <b>Tunnelled Catheter Placement</b>          |  |
| <b>Non Tunnelled Catheter Placement</b>      |  |
| <b>AV Fistula Surgery</b>                    |  |
| <b>AV Graft Surgery</b>                      |  |
| <b>AV Fistula / Graft salvage procedures</b> |  |
| <b>PD Catheter Placement</b>                 |  |

**Are Nephrology setups in your country equipped / use / or have access to equipment like?**

|                                        |            |           |
|----------------------------------------|------------|-----------|
| <b>Ultrasound Machine</b>              | <i>yes</i> | <i>No</i> |
| <b>Fluoroscopy / C- Arm / Cath lab</b> | <i>yes</i> | <i>No</i> |

**Does some nephrologists do cath-lab procedures in your country?**

|                                                                   |            |           |
|-------------------------------------------------------------------|------------|-----------|
| <b>Like Central or Peripheral Venous Angioplasty +/- Stenting</b> | <i>yes</i> | <i>No</i> |
|-------------------------------------------------------------------|------------|-----------|

|                                                              |     |    |
|--------------------------------------------------------------|-----|----|
| <b>Renal Artery Angiography /<br/>Angioplasty / Stenting</b> | yes | No |
|--------------------------------------------------------------|-----|----|

**Vascular Access Surveillance (VAS)**

|                                                                                             |             |             |          |
|---------------------------------------------------------------------------------------------|-------------|-------------|----------|
| <b>( check the box you feel appropriate )</b>                                               |             |             |          |
| <b>% Of Primary<br/>Failure rates of AVF<br/>and TCC (at<br/>3months)</b>                   | AVF Failure | TCC Failure |          |
| <b>Vascular Access<br/>Surveillance (VAS)<br/>Routinely Practiced<br/>In Dialysis Units</b> | Yes         | No          | Not Sure |
| <b>Who is trained as<br/>Manpower For VAS<br/>(Technicians/ Nurses/<br/>Doctors)</b>        | Technicians | Nurses      | Doctors  |
| <b>What Is The Preferred VAS Method:</b>                                                    |             |             |          |
| <b>Serial Clinical<br/>Examination Of AV<br/>Access</b>                                     | Yes         | No          | Not Sure |
| <b>KT/V Or URR<br/>Measurements</b>                                                         | Yes         | No          | Not Sure |
| <b>Routine Ultrasound<br/>Of AV Access</b>                                                  | Yes         | No          | Not Sure |

|                                         |  |
|-----------------------------------------|--|
| <b>Any Other<br/>Technique ( name )</b> |  |
|-----------------------------------------|--|

**Future Predictions / Directions**

|                                                                                                 |           |        |             |        |
|-------------------------------------------------------------------------------------------------|-----------|--------|-------------|--------|
| <b>Expected Growth Of ESKD<br/>Population in next 5 years<br/>(%)</b>                           | No growth | < 10 % | 10 ~<br>20% | > 20 % |
| <b>Expected Growth Of<br/>Hemodialysis units in next 5<br/>years (%) )</b>                      | No growth | < 10 % | 10 ~<br>20% | > 20 % |
| <b>Expected Growth Of CAPD<br/>in next 5 years (%) )</b>                                        | No growth | < 10 % | 10 ~<br>20% | > 20 % |
| <b>Expected Quantitative<br/>Growth Of interventional<br/>Nephrology in next 5<br/>years(%)</b> | No growth | < 10 % | 10 ~<br>20% | > 20 % |
| <b>Expected Growth Of ESKD<br/>Population in next 5 years<br/>(%)</b>                           | No growth | < 10 % | 10 ~<br>20% | > 20 % |

**Any Government Incentives/ Sponsored Programs/ Private Initiatives**

**Challenges to Practice of HD/PD in your Country**

**Expectations from & Contributions to South East Asia**

**References Used:**
